# Supplementary material for: Neurocognitive effects of six ketamine infusions and the association with antidepressant effects in treatment-resistant bipolar depression: a preliminary study
Source: PeerJ journal article supplement (doi:10.7717/peerj.10208), 2020-11-03

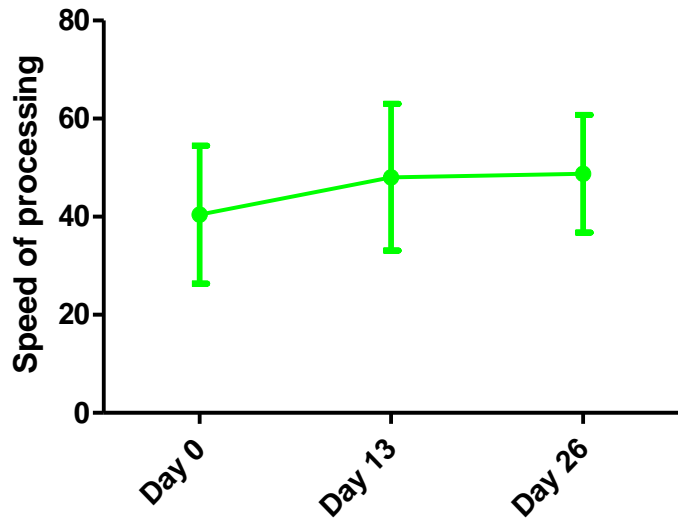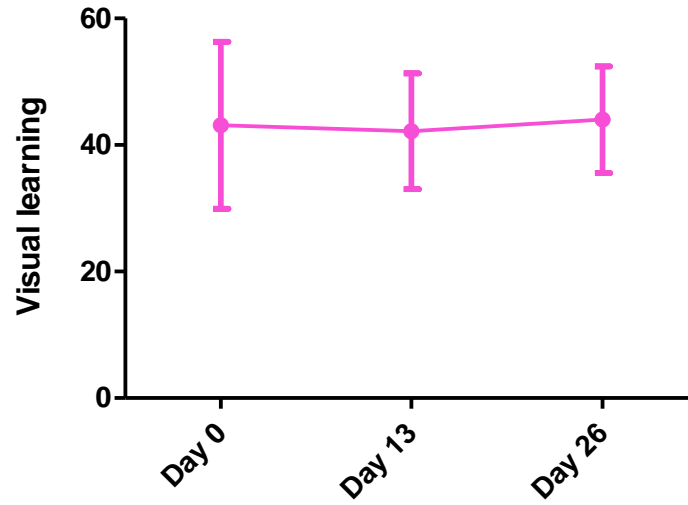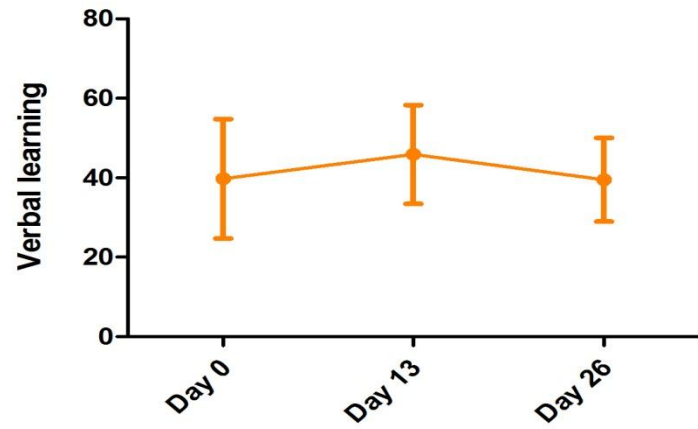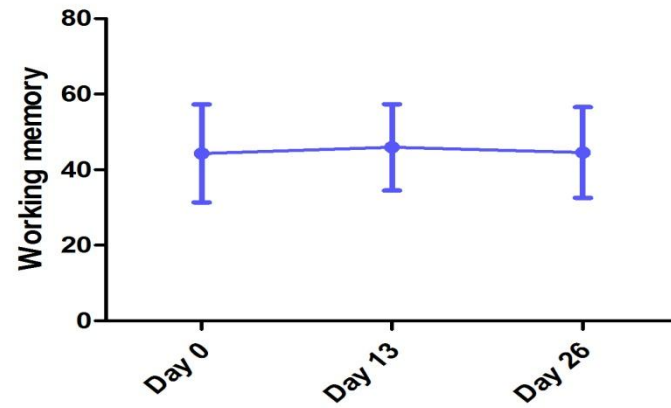

Supplement: Figure_S1.pdf [file Figure_S1.pdf]
